# Supplementary material for: Response to Bile Salts in Clinical Strains of Acinetobacter baumannii Lacking the AdeABC Efflux Pump: Virulence Associated with Quorum Sensing
Source: PubMed Central journal article supplement (PMC5423435; doi:10.3389/fcimb.2017.00143), 2017-05-09
Supplement: Table1.pdf [file Table1.pdf]

**MUTANTS from *A.baumannii* ATCC17978**

| <b>Primer name</b>                                                                                              | <b>Sequence (5'-3')</b>                                                                                                                                                                  | <b>Strain</b>                               |
|-----------------------------------------------------------------------------------------------------------------|------------------------------------------------------------------------------------------------------------------------------------------------------------------------------------------|---------------------------------------------|
| AdeLUp(BamHI)FW<br>AdeLUp(KpnI)RV<br>AdeLdown(KpnI)FW<br>AdeLdown(SphI)RV<br>Int-UpAdeL-FW<br>Int-DownAdeL-RV   | CGCGGATCCGCGCTTTC AAGTCTGCATCTTC<br>CGGGGTACCCCGGATAAAGAACTGGTCATGA<br>GGGGGTACCCCGGCATGAAATAGATCCACAC<br>GGGGCATGCCCTTGATTGTACCTTCGCGAGT<br>GGTTGGCGTATTGTAGATT<br>GGGAAAATGACATGAGGTGC | <i>A. baumannii</i> ATCC 17978Δ <i>adeL</i> |
| AdeBup(NotI)FW<br>AdeBup(BgIII)RV<br>AdeBdown(BgIII)FW<br>AdeBdown(BamHI)RV<br>Int-UpAdeB-FW<br>Int-DownAdeB-RV | CCCGCGGCCGCGGGCCGTCCGCAAGTCGGAGG<br>CCCAGATCTGGGGGTTGCGCCCCCTCAGTT<br>GGGAGATCTGGGCGCCAAAGGGCCAATATC<br>GGGGGATCCGGG TACAGGAGTCGCTGGTTC<br>AGCGGAAATTCGTCCTATCG<br>GAGAAAGGCAACACAGTC    | <i>A. baumannii</i> ATCC 17978Δ <i>adeB</i> |
| pMo130site2F<br>pMo130site2R                                                                                    | ATTCATGACCGTGCTGAC<br>CTTGTCTGTAAGCGGATG                                                                                                                                                 | Plasmid pMo130                              |

**RT-PCR Ab421 GEIH-2010**

| <b>Primer name</b>           | <b>Sequence (5'-3')</b>                             | <b>UPL Probes<br/>(number/sequence)</b> | <b>Genes</b> | <b>System</b>            |
|------------------------------|-----------------------------------------------------|-----------------------------------------|--------------|--------------------------|
| A1S_1490F<br>A1S_1490R       | CTTCTCAAATTCAGGCAGCA<br>ATTCTCGATGGCCAATAACG        | 48/ACTGGGAA                             | A1S_1490     | Acid tolerance           |
| A1S_0115F<br>A1S_0115R       | CCGCTATGGCTGTTCCAT<br>CCGCGAAAGCTCCATATAAC          | 87/GGTGGCAG                             | A1S_0115     | Quorum sensing           |
| A1S_1295F<br>A1S_1295R       | TGGTTGGTGTGCTGCTATTC<br>ATGTACTGGCAAGCCTTCAAC       | 77/GGTGGTGG                             | A1S_1295     | T6SS                     |
| A1S_1510F<br>A1S_1510R       | AGCATAATAATTAAGATCGGCATTC<br>GGTGCACAAGATAACTACAATG | 3/CCCAGCAG                              | A1S_1510     | Surface motility/Biofilm |
| AdeGF<br>AdeGR               | GTCCTGAAATGGTCGTTTCGT<br>AGCTTCTGCTTGGCTAGATGA      | 43/CTGCCCCA                             | <i>adeG</i>  | AdeFGH (RND efflux pump) |
| <i>RpoBF</i><br><i>RpoBR</i> | CGTGTATCTGCGCTTGG<br>CGTACTTCGAAGCCTGCAC            | 131/CTGGTGGT                            | <i>rpoB</i>  | Housekeeping             |

1

2 **Table S1.**

3
